# Supplementary material for: JAK-STAT activation contributes to cytotoxic T cell–mediated basal cell death in human chronic lung allograft dysfunction
Source: JCI Insight. 2023 Mar 22;8(6):e167082. doi: 10.1172/jci.insight.167082 (PMC10070100; doi:10.1172/jci.insight.167082)
Supplement: Supplemental data [file jciinsight-8-167082-s017.pdf]

## Supplementary Information

### CLAD Whole Lung Patient Characteristics

| Age | Sex | CLAD Stage | Histology Report | Native Disease                   | Time to Transplant (days) | Calcineurin Inhibitor | Third Agent  | Augmentation last 6 mths |
|-----|-----|------------|------------------|----------------------------------|---------------------------|-----------------------|--------------|--------------------------|
| 62  | M   | Stage 3    | A0B0C1           | Pulmonary veno-occlusive disease | 709                       | Cyclosporine          | MMF          | Rituxan, Belatacept      |
| 60  | F   | Stage 3    | A1C1             | Idiopathic pulmonary fibrosis    | 3589                      | Tacrolimus            | MMF          | None                     |
| 26  | F   | Stage 4    | A2B2RC1          | Cystic fibrosis                  | 472                       | Tacrolimus            | Azathioprine | Solu Medrol              |
| 63  | M   | Stage 3    | A3B1RC1          | Idiopathic pulmonary fibrosis    | 1555                      | Tacrolimus            | None         | None                     |

### Donor Control Patient Characteristics

| Age | Sex | CLAD Stage | Cause of Death | Histology Report                                                                                           |
|-----|-----|------------|----------------|------------------------------------------------------------------------------------------------------------|
| 53  | F   | Stage 0    | Anoxia         | Mild emphysematous changes with patchy bronchiolitis and mild pulmonary hypertensive arteriopathic changes |
| 61  | M   | Stage 0    | Stroke         | Patchy exudative acute lung injury with mild chronic interstitial pneumonia                                |
| 15  | M   | Stage 0    | Trauma         | No histopathologic diagnosis                                                                               |

### Lung Transplant Control Patient Characteristics

| Age | Sex | CLAD Stage | Histology Report | VATS Indication              | Time to Biopsy (days) | Calcineurin Inhibitor | Third Agent  | Augmentation last 6 mths |
|-----|-----|------------|------------------|------------------------------|-----------------------|-----------------------|--------------|--------------------------|
| 61  | M   | Stage 0    | A0B0C0           | Pleural effusion             | 552                   | Tacrolimus            | Azathioprine | Solu Medrol              |
| 68  | M   | Stage 0    | A2B0C0           | Recurrent exudative effusion | 302                   | Cyclosporine          | MMF          | None                     |
| 61  | M   | Stage 0    | A1B1RC0          | Exudative effusion           | 273                   | Tacrolimus            | None         | Belatacept, RATG         |

### Spatial Transcriptomic Data Patient Characteristics

| Age | Sex | Tissue Type   | Histology Report                                                                                               |
|-----|-----|---------------|----------------------------------------------------------------------------------------------------------------|
| 26  | F   | CLAD          | A2B2RC1; constrictive bronchiolitis with high grade lymphocytic bronchiolitis                                  |
| 27  | F   | CLAD          | A1B1C1; chronic allograft rejection with features of constrictive bronchiolitis                                |
| 48  | F   | CLAD          | A0B1RC1; constrictive bronchiolitis with low grade lymphocytic bronchiolitis without perivascular inflammation |
| 38  | M   | Donor control | Lung tissue with mild emphysema. No evidence of acute infection or malignancy.                                 |

**Supplementary Table 1: Patient characteristics.** Patient characteristics for whole lung samples used in single cell RNA sequencing and spatial transcriptomic studies as well as lung transplant control patients used in protein validation studies. The table for transplant controls includes the indication for surgical biopsy via video-assisted thoracoscopic surgery (VATS).

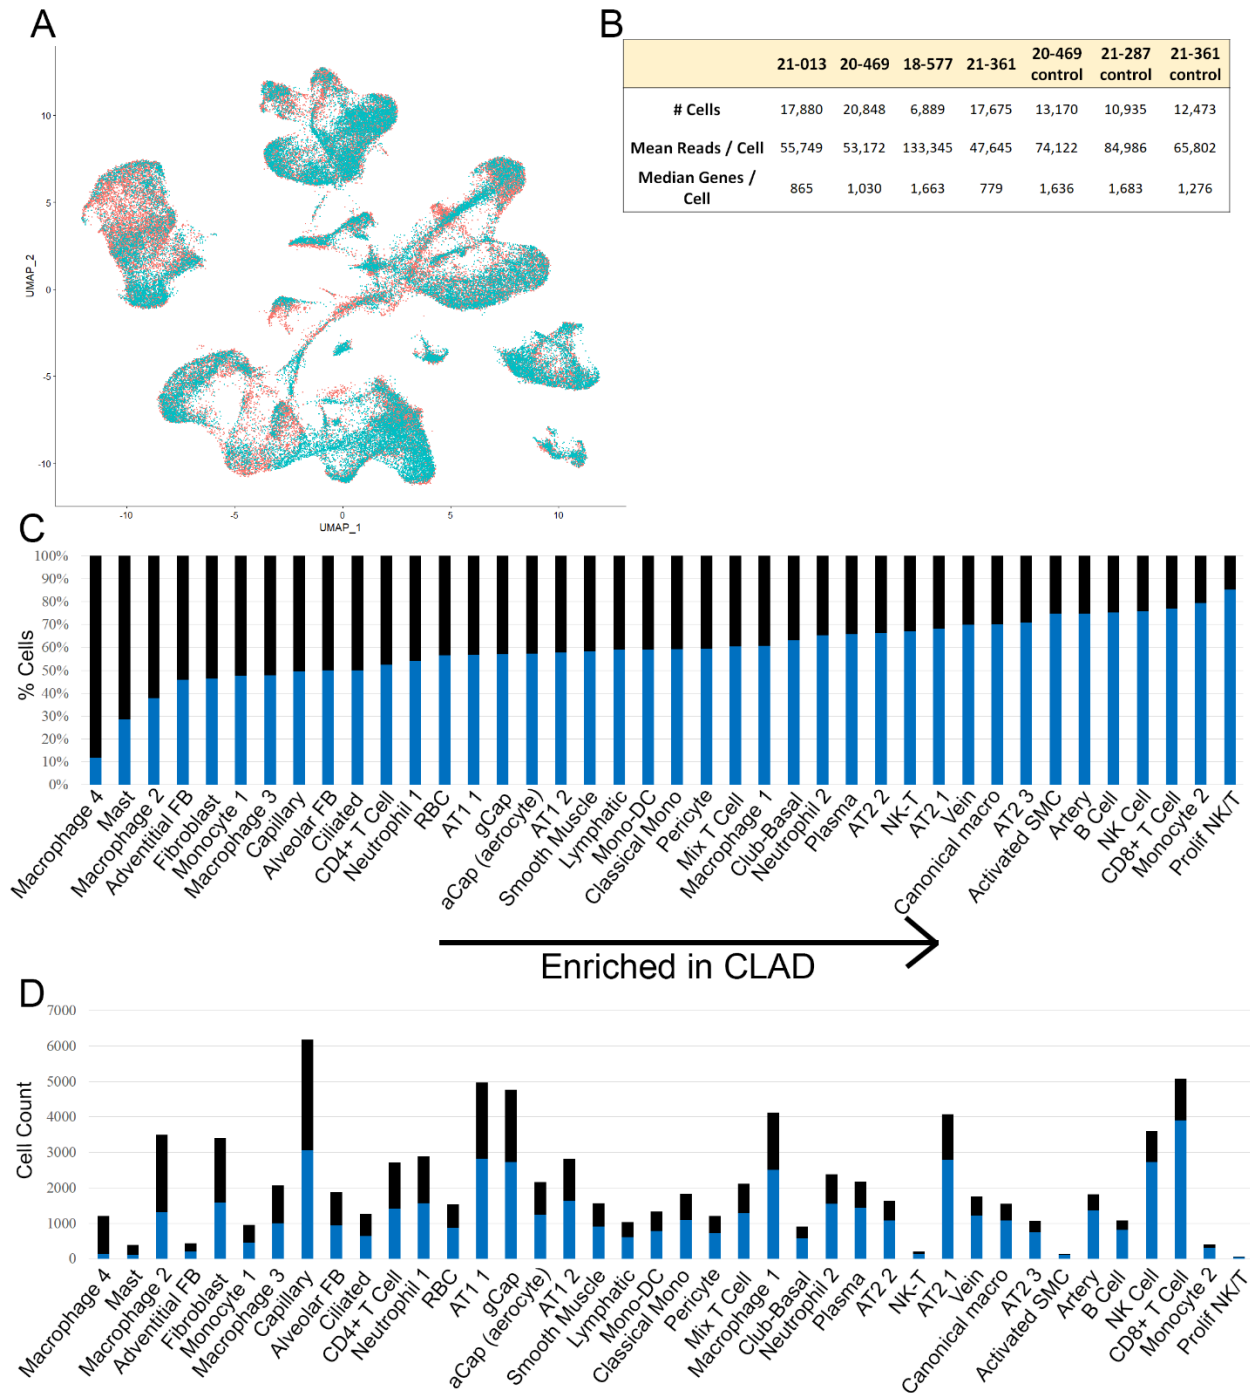

**Supplementary Figure 1: Cell count by cluster analysis for CLAD and donor control RNA sequencing data.** A. UMAP representation of combined four CLAD patient samples (orange) and three donor control samples (green). B. Raw cell count and read count for each sample. C. CLAD (blue) compared to control (black) cell representation for each cell cluster showing cell types enriched in CLAD lungs compared to control lungs. D. Raw cell count by cluster analysis of four CLAD patient samples (blue) and three donor control samples (black). Complete annotations of cell types are provided in Supplementary Data 1.

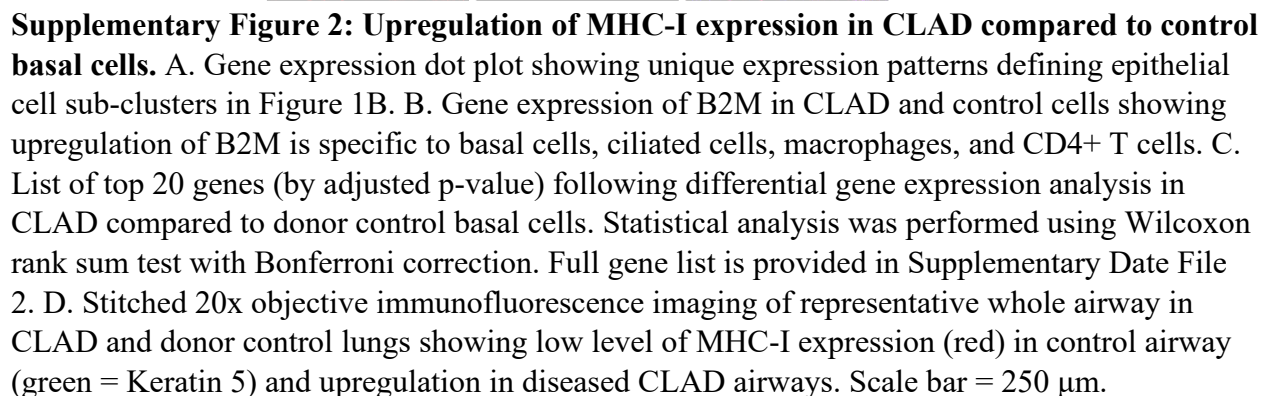

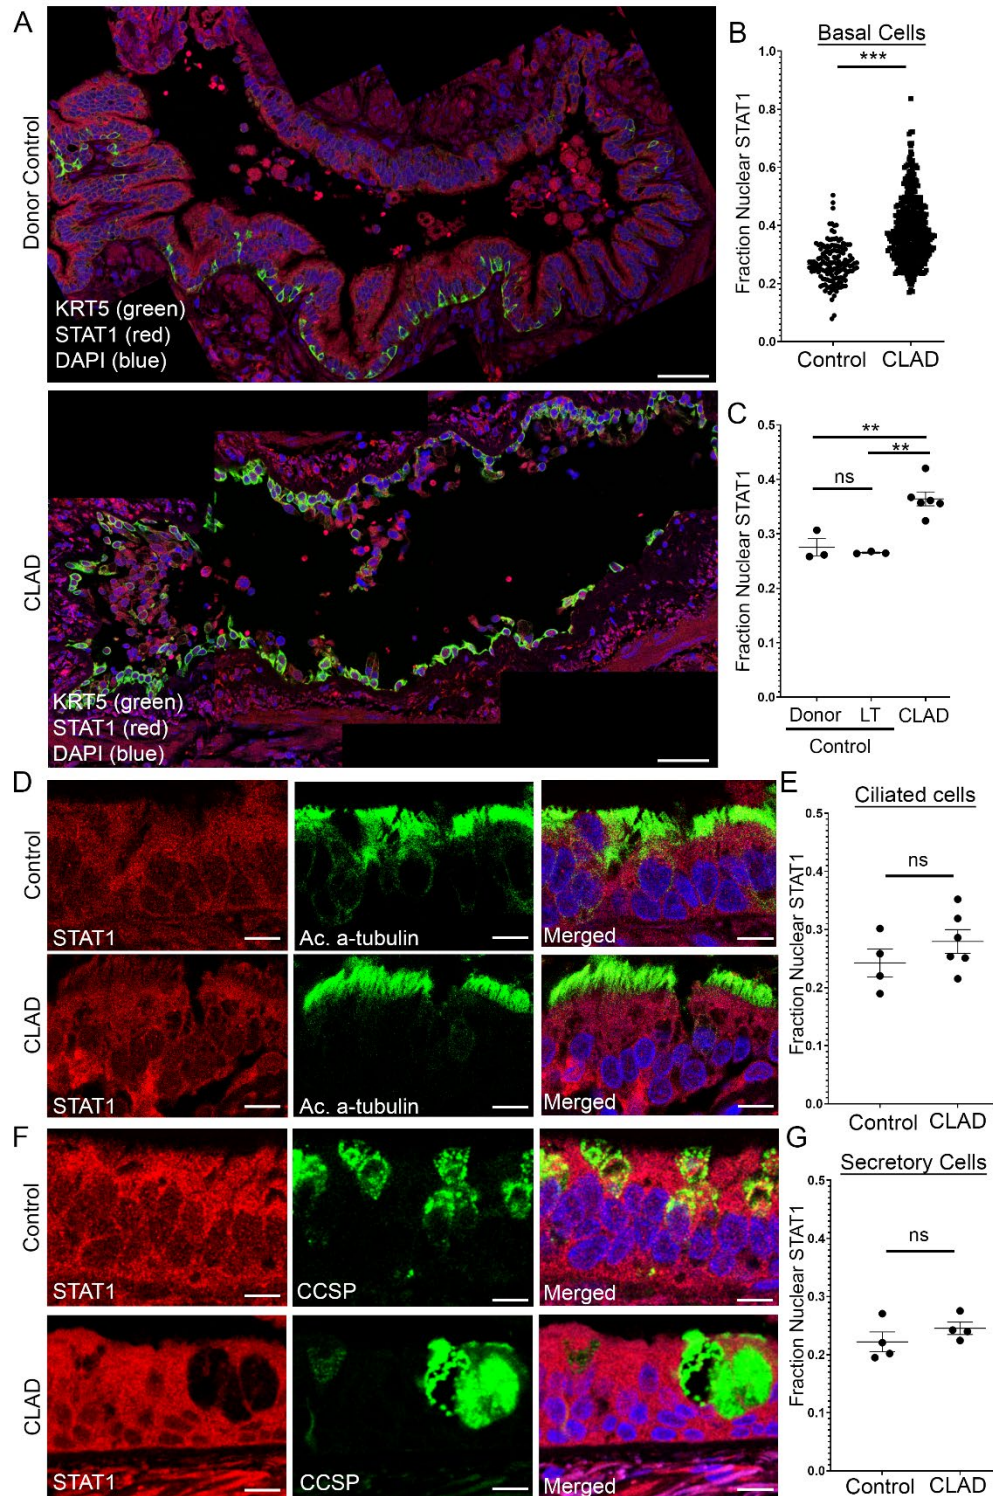

**Supplementary Figure 3: Increased nuclear localization of STAT1 in CLAD basal cells but not CLAD ciliated and secretory cells.** A. Stitched 40x objective confocal images of immunofluorescent staining for KRT5 (green), STAT1 (red), and DAPI (blue) in CLAD and control airways of similar size. Extensive fibrosis and epithelial damage are present in the CLAD airway. Scale bar = 50 $\mu$ m. B. Quantification of the fraction of nuclear STAT1 across all KRT5+

cells in a single 5µm section from 6 CLAD and 6 control samples. C. Quantification of fraction of nuclear STAT1 in CLAD samples (n=6) compared to lung transplant (LT) control (n=3) and donor control (n=3) showing no significant difference in nuclear STAT1 expression in the two control groups. D-G. Immunofluorescence with quantification showed no significant change in nuclear localization of STAT1 in CLAD ciliated (D-E) or secretory cells (F-G) compared to control. Scale bar = 10µm. Statistical analysis for immunofluorescence experiments was performed using the unpaired parametric t-test (B, E, and G) or one-way ANOVA ( $p < 0.05$ ) with post-hoc Tukey test (C). Graph depicts mean with SEM. \*\* =  $p < 0.01$ , \*\*\* =  $p < 0.001$ .

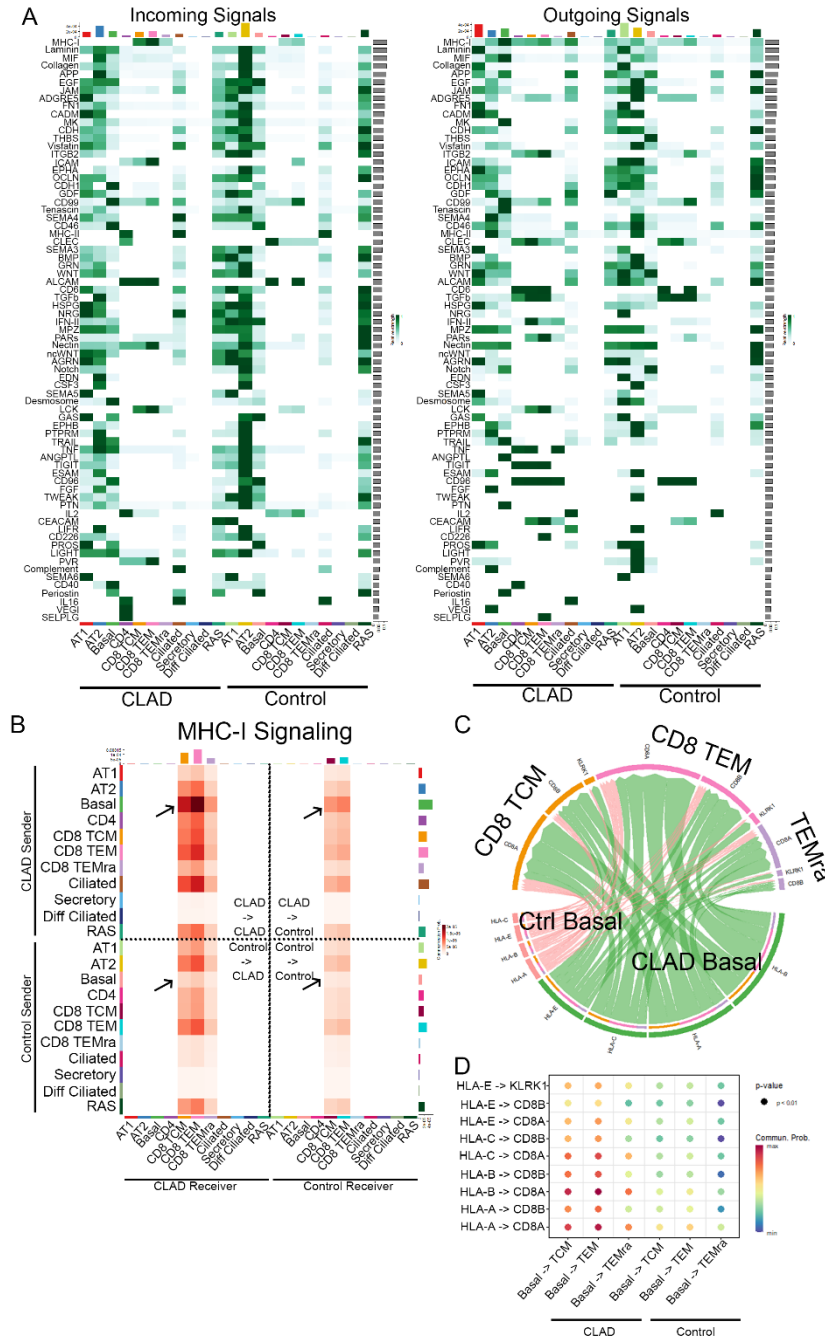

**Supplementary Figure 4: Cell Chat analysis predicts increased CLAD basal cell to CD8+ T cell interactions via MHC-I signaling compared to control basal cells.** A. Signaling pathways contributing most to outgoing and incoming signals in predicted epithelial-T cell interactions. B. Heatmap of predicted epithelial-T cell interactions via MHC-I signaling shows highest predicted interaction between CLAD basal cells and CLAD CD8+ TEM cells. Arrows show comparison of basal and CD8+ T cell interactions in CLAD and control cells. C. Chord diagram shows a predicted increase in CLAD basal cell compared to control basal cell CD8+ T cell interactions via MHC-I signaling. D. Bubble plot showing all significant predicted MHC-I mediated interactions between basal cells and CD8+ T cells.

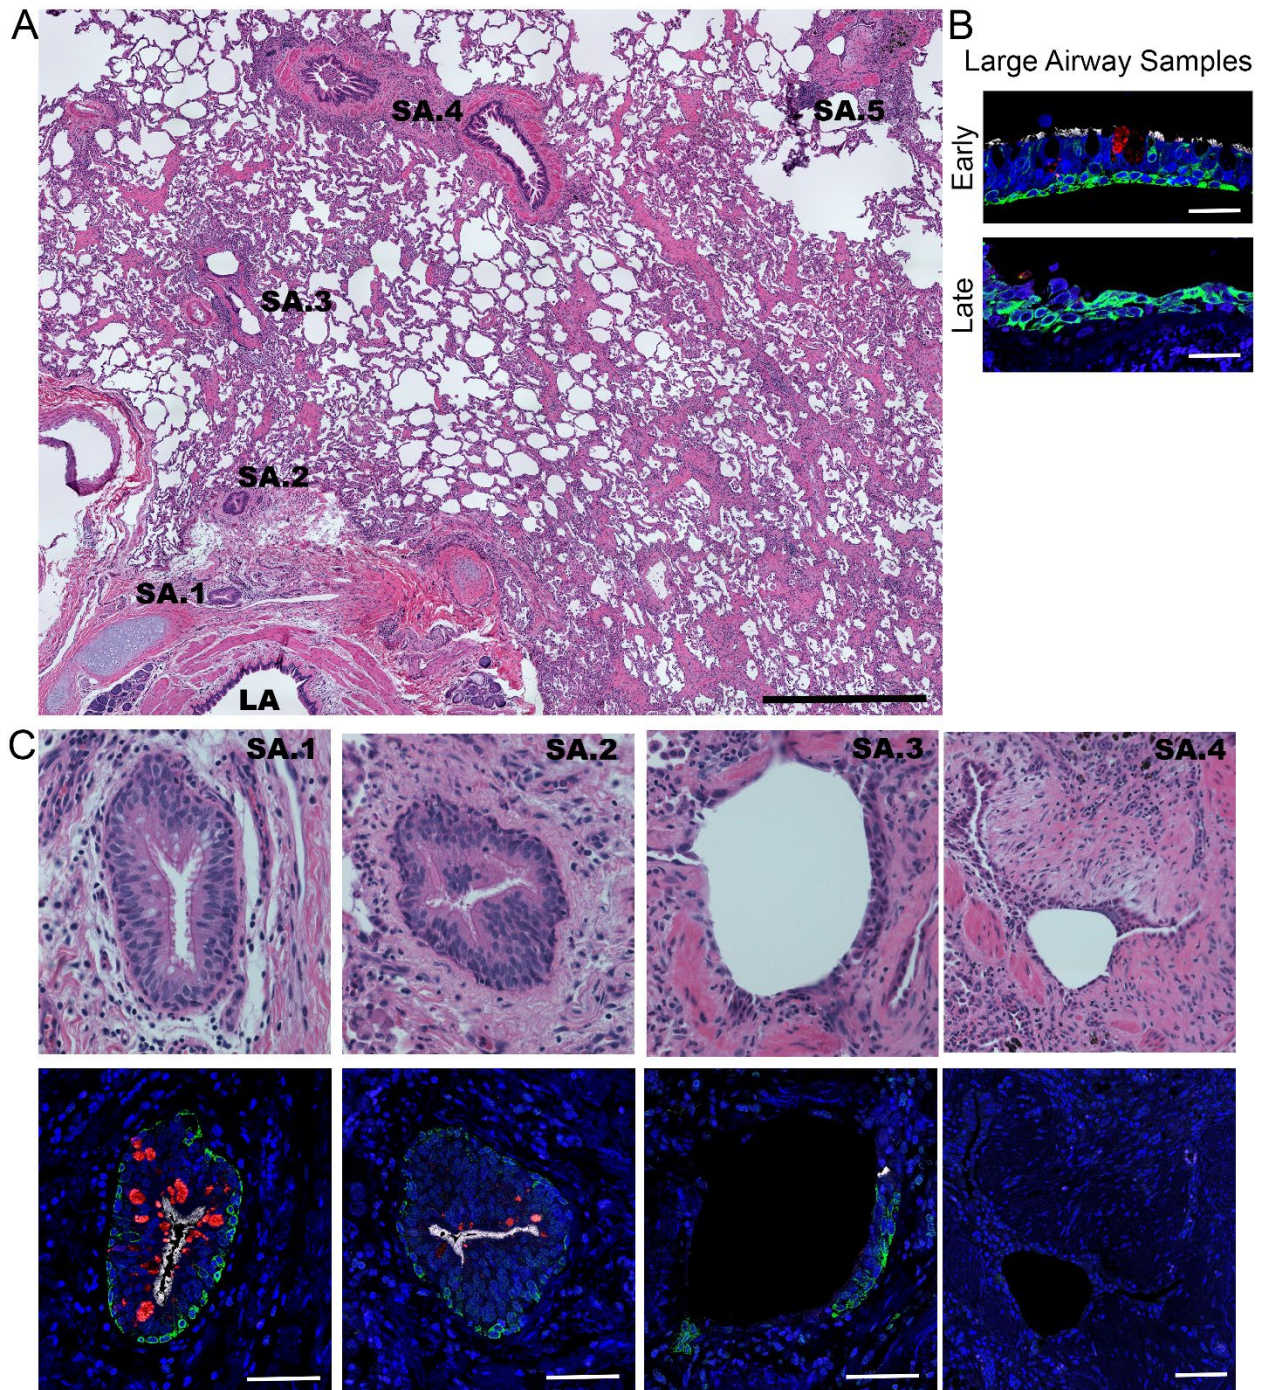

**Supplementary Figure 5: Heterogeneity of disease in CLAD.** A. H&E staining from a single CLAD patient explant showing large (LA) and small airways (SA) in various stages of disease. Scale bar = 1000um. B. High resolution view of large airways from the same patient sample showing varying degrees of epithelial cell damage from intact epithelium (top) to complete loss of normal epithelial markers in the setting of advanced airway fibrosis (bottom). Keratin 5 = green, SCGB1A1 = red, acetylated alpha-tubulin = white. Scale bar = 50um. C. High resolution H&E staining (top) and immunofluorescence (bottom) from (A) showing four small airways (SA) in different stages of disease as determined by loss of epithelial cells, inflammation, and

peribronchiolar fibrosis. SA.1 provides an example of a normal small airway while SA.4 demonstrates a classic bronchiolitis obliterans lesion. Keratin 5 = green, SCGB1A1 = red, acetylated alpha-tubulin = white. Scale bar = 50um.

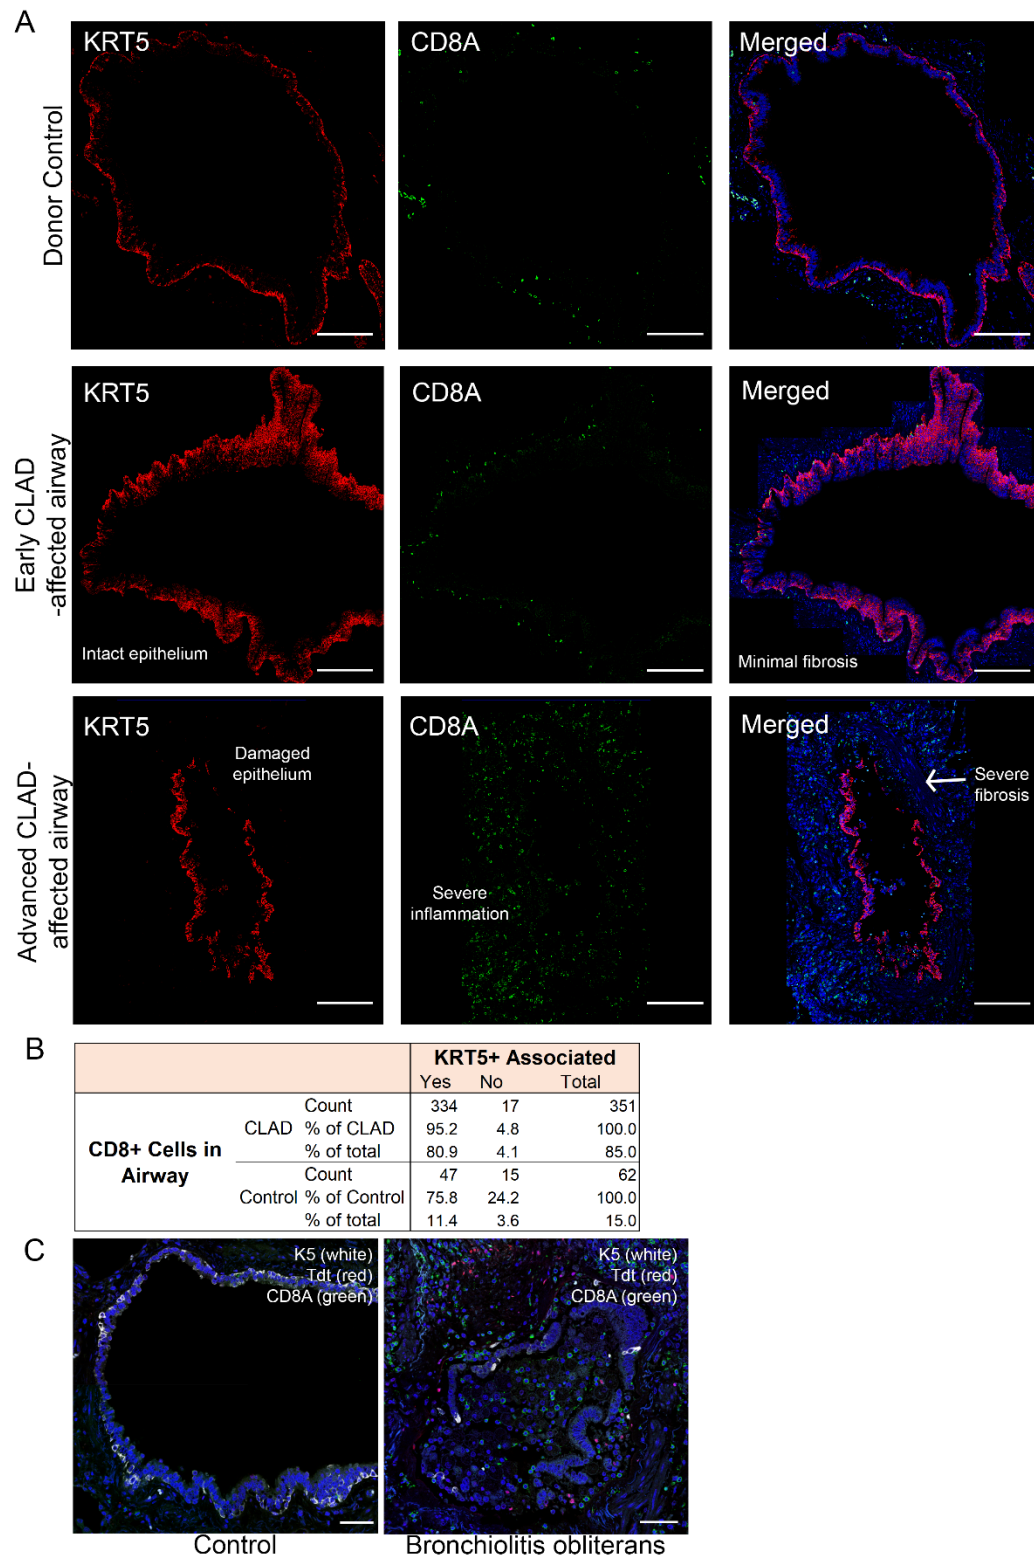

**Supplementary Figure 6: Increased co-localization of CD8+ T cells with basal cells in early CLAD-affected airways.** A. Stitched confocal images of immunofluorescence staining for CD8A and KRT5 in control (top), early CLAD-affected airways with intact epithelium and minimal fibrosis (middle), and advanced CLAD-affected airways (bottom) shows increased co-

localization of CD8<sup>+</sup> T cells with basal cells in early CLAD-affected airways compared to control airways. B. Contingency table of CD8<sup>+</sup> T cell counts within early CLAD-affected and control airways in direct association with KRT5<sup>+</sup> basal cells. Analysis with Fisher's exact test showed a significant increase ( $p < 0.0001$ ) in CD8<sup>+</sup> T cells in direct association with KRT5<sup>+</sup> basal cells in early CLAD-affected airways compared to control airways. C. Stitched confocal images of CD8A (green), KRT5 (white), and TUNEL staining for apoptosis (red) in CLAD and control airways showing diffuse CD8<sup>+</sup> T cell infiltration and apoptosis in a BO lesion in CLAD that were not observed in control airways. Scale bar = 50 $\mu$ m.

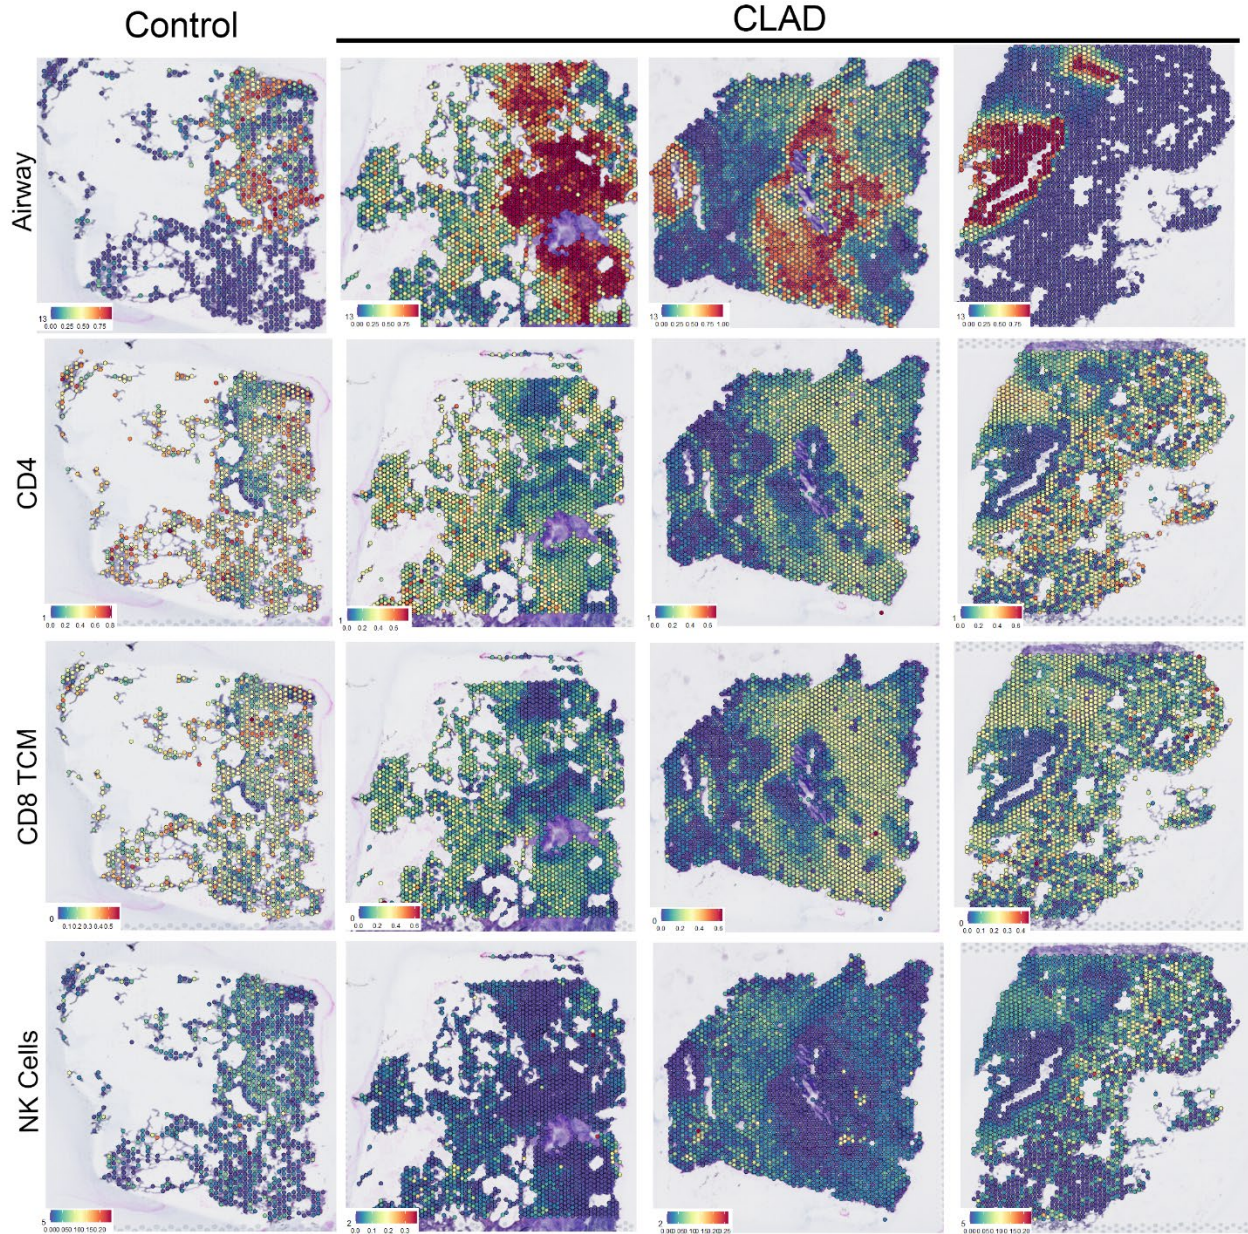

**Supplementary Figure 7: Mapping of T cell populations from single cell RNA sequencing dataset onto spatial transcriptomic datasets in CLAD.** Mapping of airway secretory cells, CD4 T cells, CD8 TCM cells, and NK cells defined by single cell RNA sequencing dataset (Figure 4) onto control (left panel) and CLAD (right three panels) spatial transcriptomic datasets.
